# Supplementary material for: Outpatient percutaneous native renal biopsy: safety profile in a large monocentric cohort
Source: PubMed Central journal article supplement — BMJ Open. 2017 Jun 21;7(6):e015243. doi: 10.1136/bmjopen-2016-015243 (PMC5734246; doi:10.1136/bmjopen-2016-015243), 2017-06-21
Supplement: bmjopen-2016-015243supp001.pdf [file bmjopen-2016-015243supp001.pdf]

|                                            | Univariate model     |       |                      |       | Multivariate Model  |       |                        |       |
|--------------------------------------------|----------------------|-------|----------------------|-------|---------------------|-------|------------------------|-------|
|                                            | Major Complications  |       | Minor complication   |       | Major Complications |       | Minor complication     |       |
|                                            | OR (95%CI)           | p=    | OR (95%CI)           | p=    | OR (95%CI)          | p=    | OR (95%CI)             | p=    |
| Number of biopsy passes                    | 1.15<br>(0.41-3.22)  | 0.78  | 1.882<br>(0.23-3.68) | 0.83  | -                   | -     | -                      | -     |
| Diagnosis*                                 | 1.00<br>(0.31-3.20)  | 0.99  | 1.70<br>(0.54-5.50)  | 0.41  | -                   | -     | -                      | -     |
| Male                                       | 0.40<br>(0.10-0.95)  | 0.039 | 0.46 (0.06-3.40)     | 0.71  | 0.56<br>(0.11-1.11) | 0.071 | 0.51<br>(0.36-4.10)    | 0.89  |
| Age (≥60)                                  | 2.30<br>(1.50-3.50)  | 0.032 | 1.20<br>(0.80-2.00)  | 0.12  | 2.07<br>(0.89-2.70) | 0.056 | 1.12<br>(0.87-2.99)    | 0.34  |
| Kidney size at sonographic investigations# | 0.63<br>(0.25-1.60)  | 0.54  | 0.79<br>(0.31-2.00)  | 0.32  | -                   | -     | -                      | -     |
| Haematuria**                               | 1.21<br>(0.38-3.90)  | 0.75  | 0.92<br>(0.28-3.00)  | 0.88  | -                   | -     | -                      | -     |
| Nephrosic proteinuria**                    | 1.60<br>(1.07-3.00)  | 0.048 | 1.60<br>(0.84-3.00)  | 0.14  | 1.54<br>(0.91-3.24) | 0.37  | 1.70<br>(0.82-3.12)    | 0.17  |
| Haemoglobin level**(<10 g/dl)              | 1.98<br>(1.40-3.00)  | 0.041 | 1.27<br>(1.01-2.43)  | 0.047 | 1.32<br>(0.98-2.11) | 0.067 | 1.17<br>(0.89-2.21)    | 0.071 |
| Thrombocytopenia                           | 3.40<br>(0.33-34.00) | 0.87  | 2.80<br>(0.29-8.00)  | 0.91  | -                   | -     | -                      | -     |
| Severe arterial hypertension**             | 2.90 (1.30-4.10)     | 0.003 | 1.60 (1.02-2.50)     | 0.04  | 2.01 (1.2-4.7)      | 0.037 | 1.05<br>(0.97-2.6)     | 0.065 |
| Serum creatine >3 mg/dl*                   | 2.50<br>(1.86-3.60)  | 0.001 | 2.98<br>(1.61-6.90)  | 0.029 | 2.02<br>(0.95-3.06) | 0.053 | OR 2.03<br>(1.18-6.81) | 0.025 |
| Anti-platelets*                            | 2.29<br>(1.50-3.60)  | 0.001 | 2.07<br>(1.12-4.02)  | 0.031 | 2.10<br>(0.69-2.80) | 0.48  | 1.57<br>(0.91-3.02)    | 0.059 |
| LMWH*                                      | 1.21<br>(0.38-3.90)  | 0.49  | 0.92<br>(0.28-3.00)  | 0.88  | -                   | -     | -                      | -     |
| Anti-hypertensive agents*                  | 3.40<br>(0.54-31.00) | 0.75  | 2.77<br>(0.67-17.00) | 0.53  | -                   | -     | -                      | -     |

\* categorised in primary glomerulopathy or systemic autoimmune condition; \*\*before the kidney biopsy; # < 8 cm (as defined as J Ultrasound. 2007 Dec;10(4):161-7.)
